# Supplementary material for: Fabrication and characterization of Ag2CO3/SnS2 composites with enhanced visible-light photocatalytic activity for the degradation of organic pollutants
Source: Royal Society of Chemistry journal article supplement (doi:10.1039/c5ra18262j), 2015-01-01
Supplement: c5ra18262j1.pdf [file c5ra18262j1.pdf]

## Supporting information

### **Fabrication and characterization of $\text{Ag}_2\text{CO}_3/\text{SnS}_2$ composites with enhanced visible-light photocatalytic activity for the degradation of organic pollutants**

*Jin Luo,\* Xiaosong Zhou, Jinquan Zhang, Zhihua Du*

School of Chemistry and Chemical Engineering, Institute of Physical Chemistry, and  
Development Center for New Materials Engineering & Technology in Universities of  
Guangdong, Lingnan Normal University, Zhanjiang 524048, China

E-mail: [lj328520504@126.com](mailto:lj328520504@126.com)

**Synthesis of mechanically mixed  $\text{Ag}_2\text{CO}_3(2.0\text{wt\%})/\text{SnS}_2$  sample:**

Mechanically mixed  $\text{Ag}_2\text{CO}_3(2.0\text{wt\%})/\text{SnS}_2$  sample was prepared by finely grinding 0.01 g of  $\text{Ag}_2\text{CO}_3$  with 0.49 g of  $\text{SnS}_2$ . The obtained product was denoted as mechanically mixed  $\text{Ag}_2\text{CO}_3(2.0\text{wt\%})/\text{SnS}_2$ .

**Photocatalytic degradation of rhodamine B (RhB):**

The photocatalytic performance of the as-prepared samples was evaluated by the degradation of RhB in aqueous solution under visible light. A 500 W Xe-arc lamp equipped with a 420 nm cutoff filter was used as a visible light source. In a typical photocatalytic measurement, suspension including the photocatalyst (50 mg) and RhB solution (150 mL, 20 mg  $\text{L}^{-1}$ ) was laid in a 250 mL cylindrical quartz reactor equipped with a water circulation facility. Before irradiation, the reaction suspension was ultrasonicated for 5 min and stirred in the dark for 60 min to ensure the equilibrium of adsorption and desorption. During the photocatalytic tests, 5 mL of the suspension was obtained at a given time intervals, followed by centrifugation at 10000 rpm for 10 min to remove the photocatalyst. The concentration of the remaining RhB was measured by its absorbance ( $A$ ) at 553 nm with a Hitachi UV-3010 spectrophotometer. The degradation ratio of RhB can be calculated by  $X=(A_0-A_t)/A_0\times 100\%$ , where  $A_0$  and  $A_t$  are the concentration of RhB before illumination and after illumination time  $t$ .

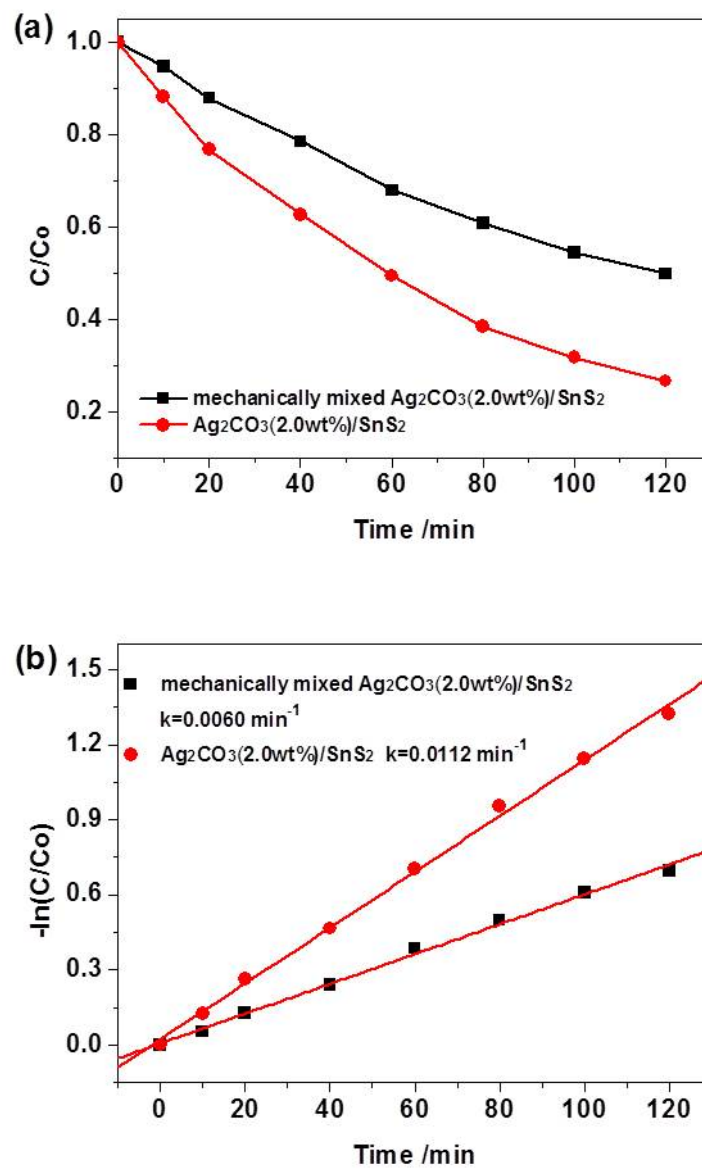

Fig. S1. Comparison of photocatalytic activities (a) and first-order kinetic plots (b) for the photodegradation of MO in aqueous solution over  $\text{Ag}_2\text{CO}_3(2.0\text{wt}\%)/\text{SnS}_2$  composite to mechanically mixed  $\text{Ag}_2\text{CO}_3(2.0\text{wt}\%)/\text{SnS}_2$ .

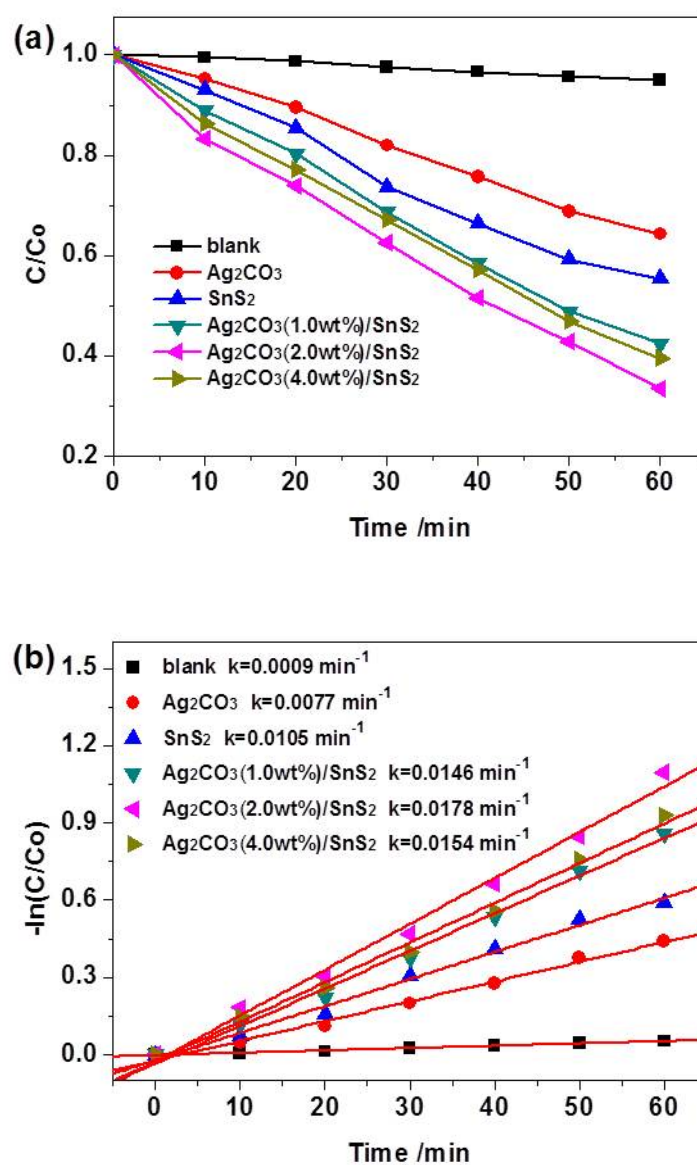

Fig. S2. Photocatalytic activities (a) and first-order kinetic plots (b) for the photodegradation of RhB in aqueous solution over the as-prepared samples under visible light irradiation.

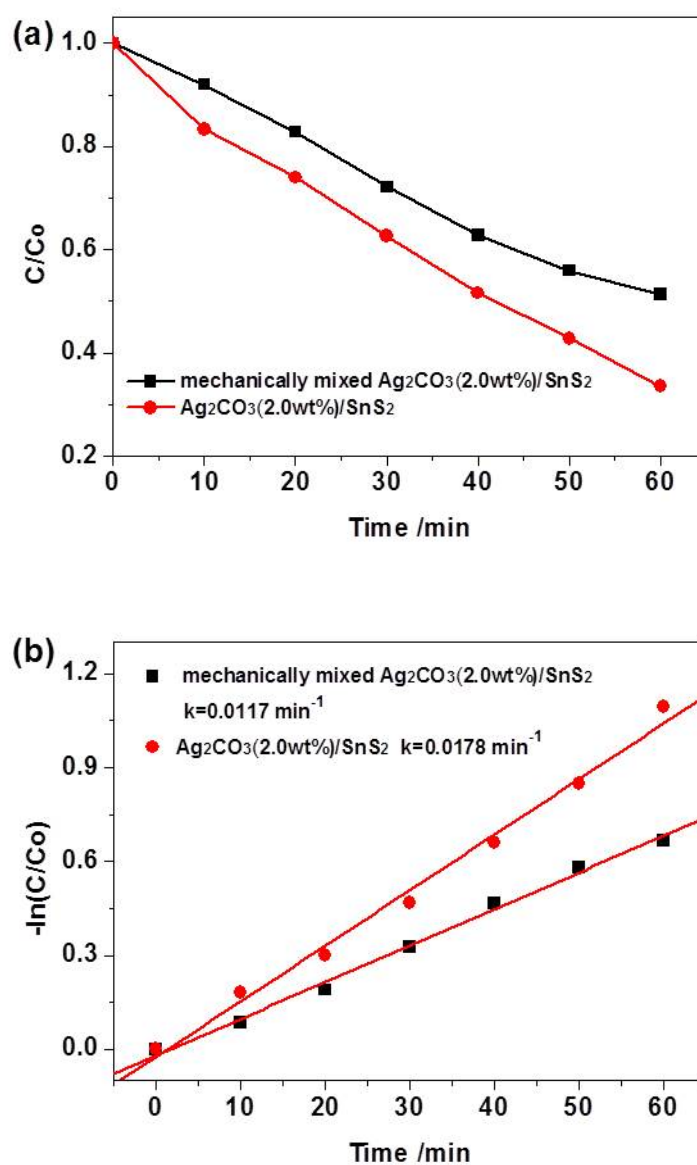

Fig. S3. Comparison of photocatalytic activities (a) and first-order kinetic plots (b) for the photodegradation of RhB in aqueous solution over  $\text{Ag}_2\text{CO}_3(2.0\text{wt}\%)/\text{SnS}_2$  composite to mechanically mixed  $\text{Ag}_2\text{CO}_3(2.0\text{wt}\%)/\text{SnS}_2$ .
